# Supplementary material for: Identification of novel therapeutics for complex diseases from genome-wide association data
Source: PubMed Central journal article supplement (PMC4101352; doi:10.1186/1755-8794-7-s1-s8), 2014-05-08

**Table S1 - SNPs per phenotype, WTCCC study associated loci (HS) and *Gentrepid* predicted candidate genes per phenotype**

| Phenotype | WS<br>$p \leq 1 \times 10^{-3}$<br>SNPs<br>(Clusters) | MWS<br>$p \leq 1 \times 10^{-4}$<br>SNPs<br>(Clusters) | MHS<br>$p \leq 1 \times 10^{-5}$<br>SNPs<br>(Clusters) | HS<br>$p \leq 5 \times 10^{-7}$<br>SNPs<br>(Clusters) | Loci in the<br>original<br>WTCCC<br>Study | <i>Gentrepid</i><br>predicted<br>candidate<br>genes |
|-----------|-------------------------------------------------------|--------------------------------------------------------|--------------------------------------------------------|-------------------------------------------------------|-------------------------------------------|-----------------------------------------------------|
| CAD       | 757 (436)                                             | 134 (86)                                               | 43 (22)                                                | 25 (10)                                               | 1                                         | 264                                                 |
| HT        | 799 (460)                                             | 110 (61)                                               | 5 (5)                                                  | 0 (0)                                                 | 0                                         | 219                                                 |
| T2D       | 725 (421)                                             | 125 (70)                                               | 45 (15)                                                | 19 (2)                                                | 3                                         | 291                                                 |
| T1D       | 966 (442)                                             | 276 (103)                                              | 162 (43)                                               | 92 (24)                                               | 7                                         | 358                                                 |
| RA        | 699 (429)                                             | 104 (75)                                               | 27 (14)                                                | 11 (5)                                                | 3                                         | 200                                                 |
| CD        | 1064 (501)                                            | 261 (112)                                              | 102 (23)                                               | 63 (10)                                               | 9                                         | 378                                                 |
| BD        | 797 (513)                                             | 138 (94)                                               | 23 (10)                                                | 0 (0)                                                 | 1                                         | 212                                                 |

Abbreviations - T2D - Type 2 Diabetes; BD - Bipolar Disorder; CD - Crohn's Disease; HT -

Hypertension; T1D - Type 1 Diabetes; CAD - Coronary Artery Disease; RA - Rheumatoid Arthritis; SNP - Single Nucleotide Polymorphism; WTCCC - Wellcome Trust Case-Control Consortium; WS: Weakly Significant Set; MWS: Moderately-Weak Significant Set; MHS: Moderately-High Significant set; HS: Highly Significant Set.

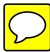

**BD**

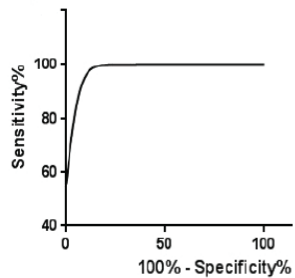

**T1D**

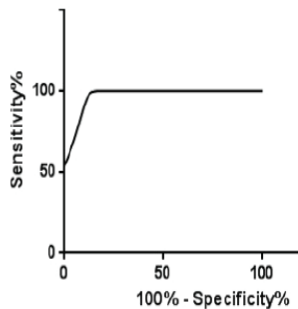

**CD**

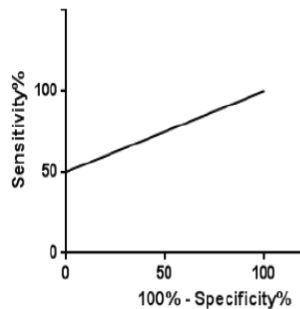

**RA**

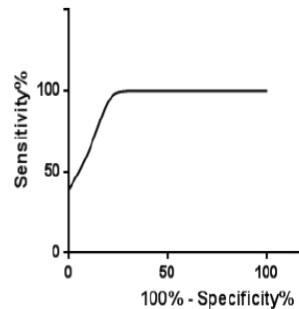

**CAD**

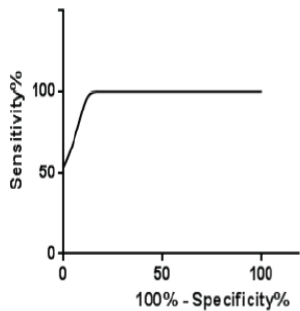

**HT**

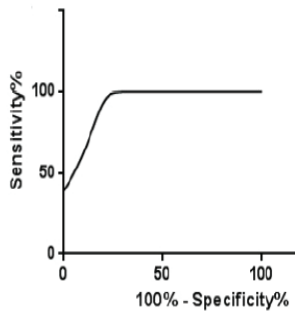

**T2D**

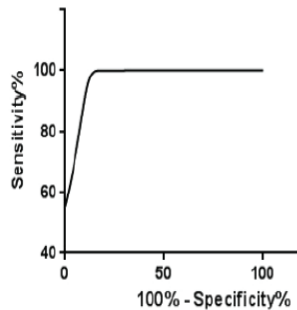

**Table S2 - AUC values for ROC curves**

| <b>Phenotype</b> | <b>AUC (figure S1)</b> | <b>AUC (figure S2)</b> |
|------------------|------------------------|------------------------|
| T2D              | 0.98                   | 0.95                   |
| T1D              | 0.97                   | 0.97                   |
| RA               | 0.95                   | 0.97                   |
| HT               | 0.95                   | 0.97                   |
| BD               | 0.98                   | 0.98                   |
| CD               | 0.99                   | 0.97                   |
| CAD              | 0.97                   | 0.97                   |

Abbreviations - T2D - Type 2 Diabetes; BD - Bipolar Disorder; CD - Crohn's Disease; HT - Hypertension; T1D - Type 1 Diabetes; CAD - Coronary Artery Disease; RA - Rheumatoid Arthritis; AUC - Area under curve.

**BD**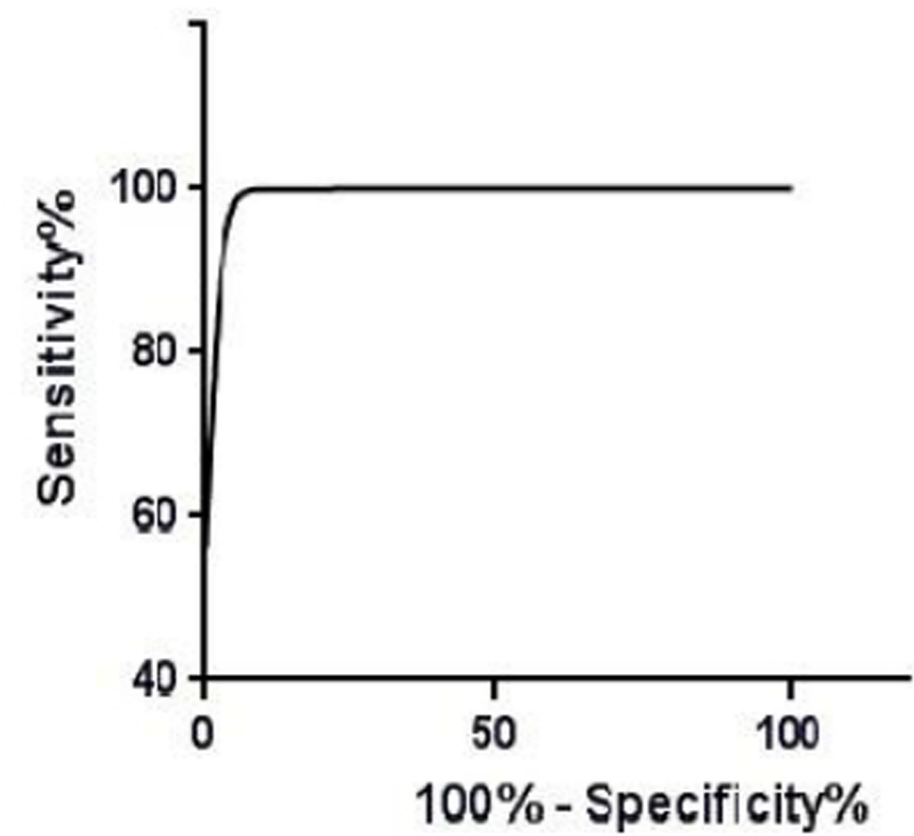**CAD**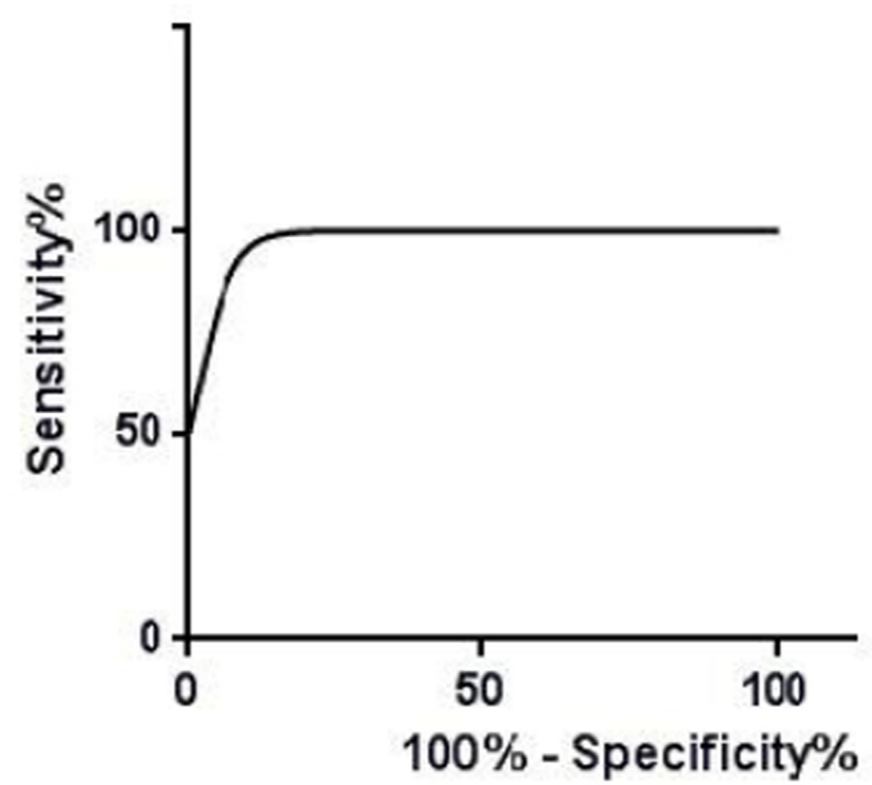**HT**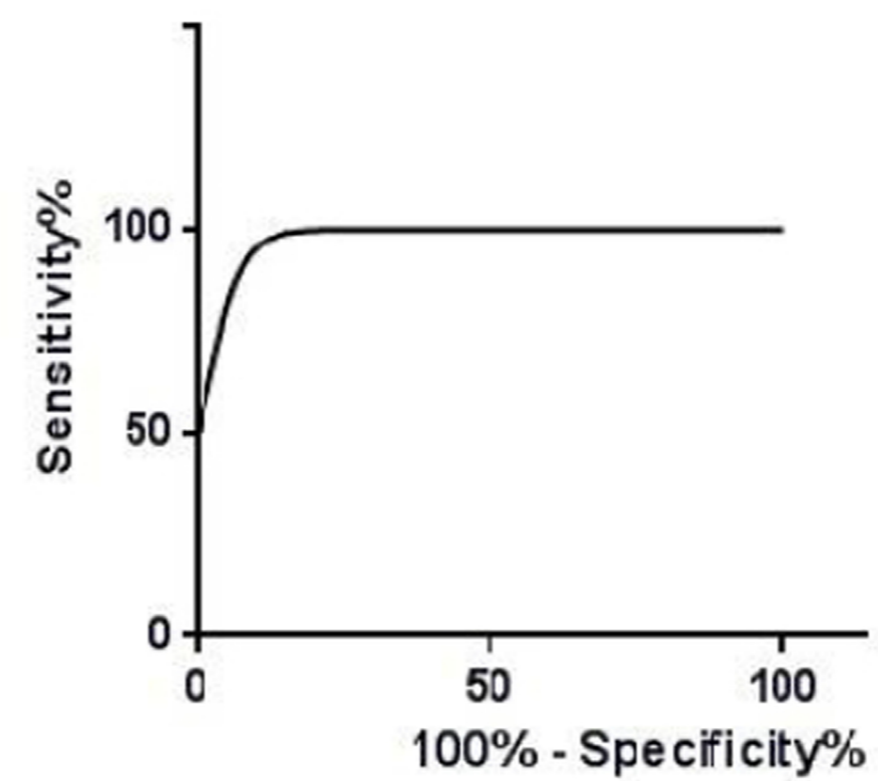**CD**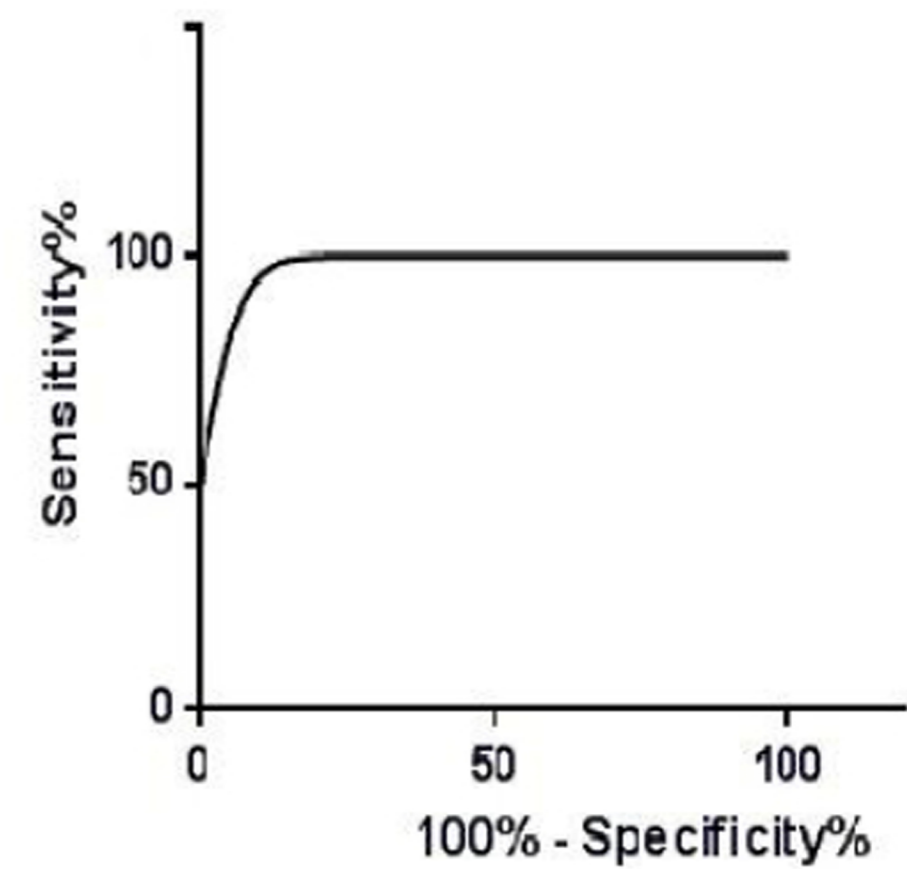**T1D**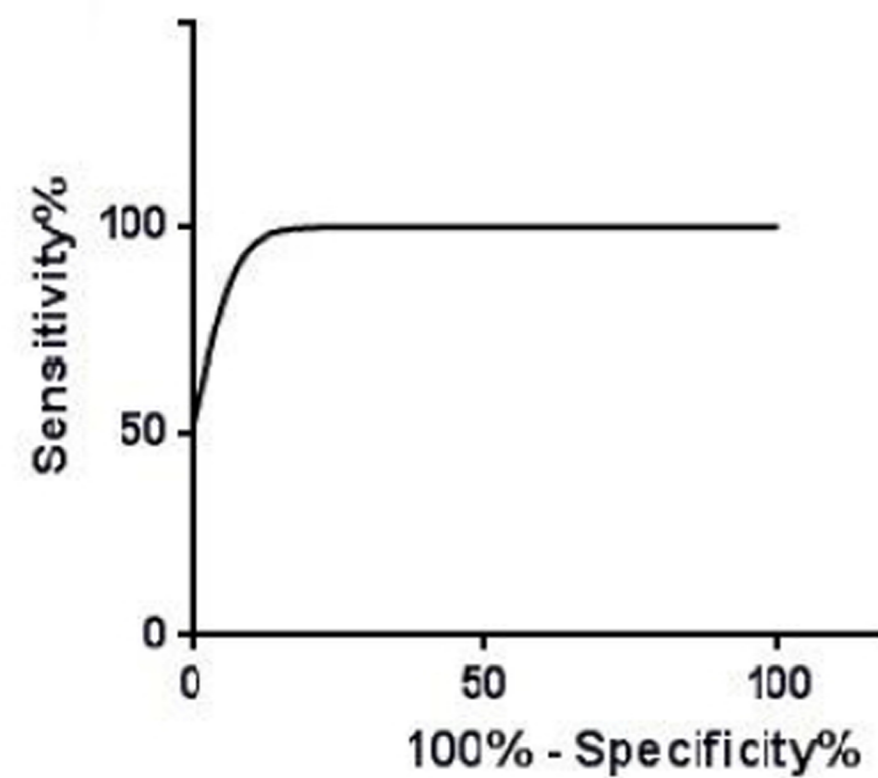**RA**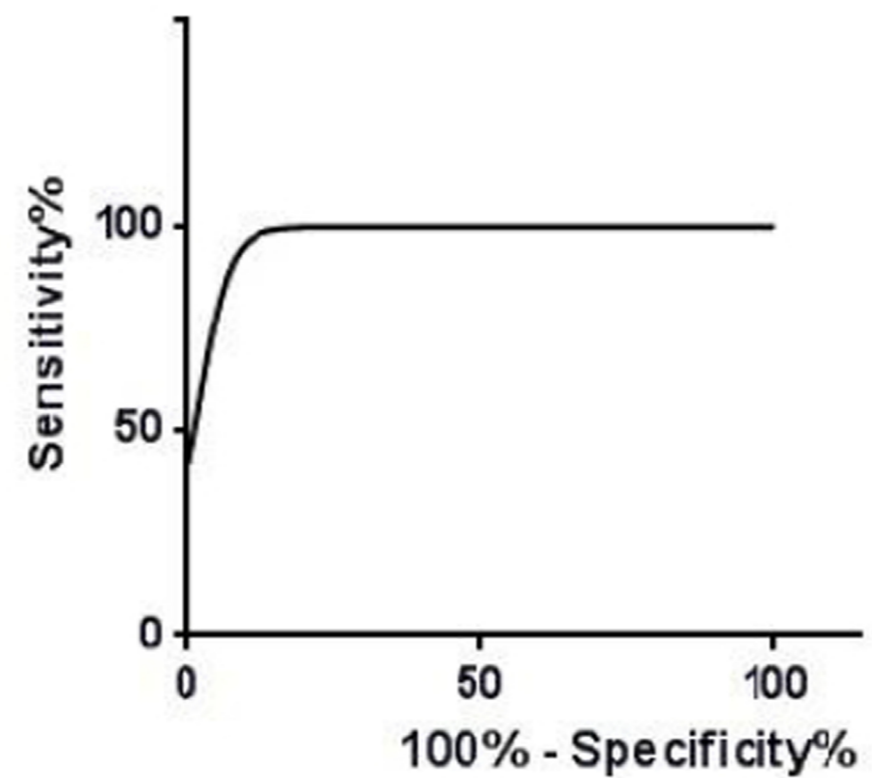**T2D**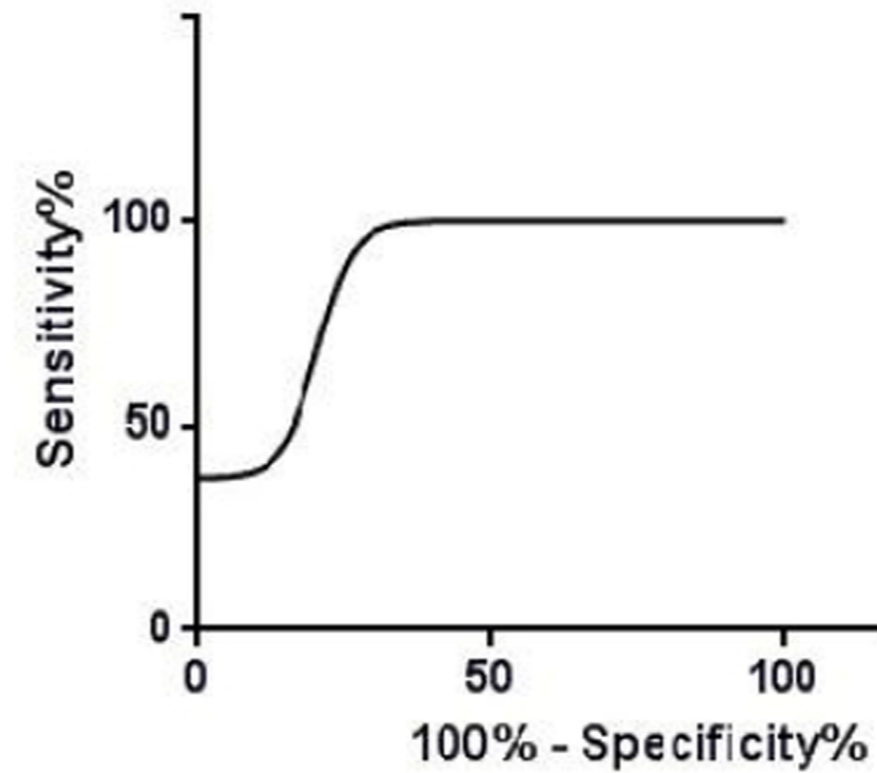

Supplement: 1755-8794-7-S1-S8-S1.pdf [file 1755-8794-7-S1-S8-S1.pdf]
